# Supplementary material
Source: PubMed Central journal article supplement (PMC2265177)

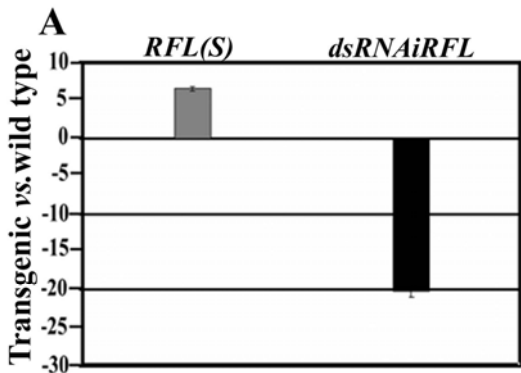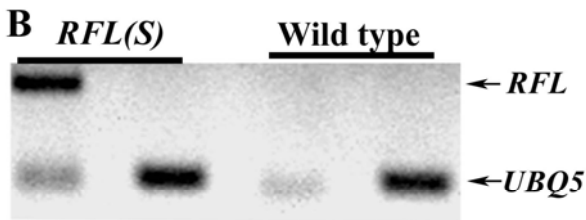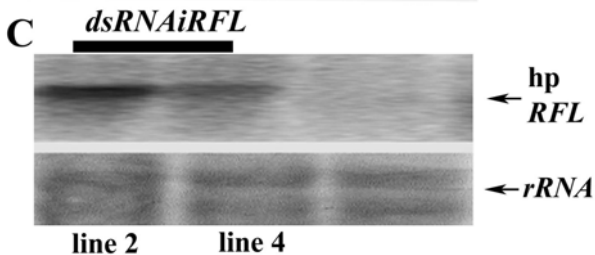

Supplement: pnas_0709059105_1.pdf [file pnas_0709059105_1.pdf]

# Leaf stages

**A**

13d pg

23d pg

50d pg

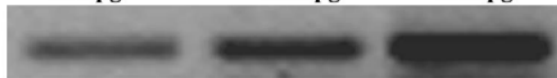← *OsSOC1*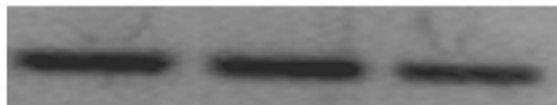← *UBQ5***B**

TP 309

Azucena

TP 309

Azucena

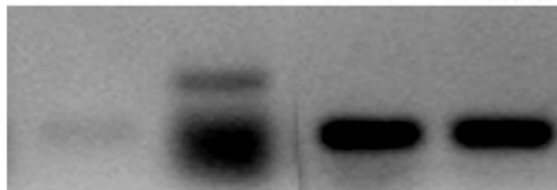← *Hd3a*← *UBQ5*

Supplement: pnas_0709059105_2.pdf [file pnas_0709059105_2.pdf]

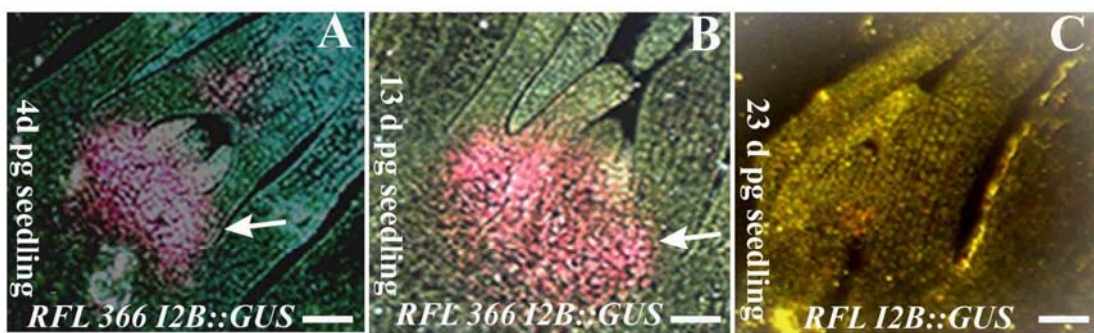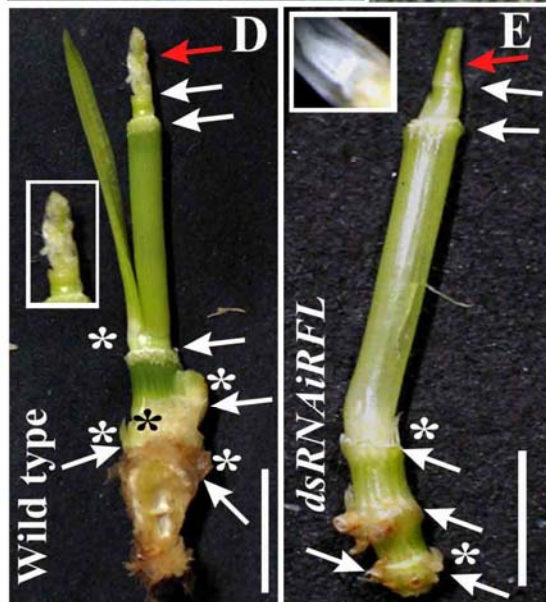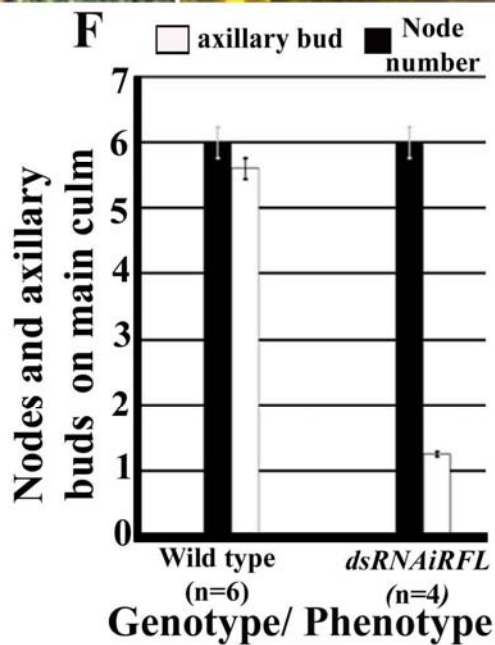

Supplement: pnas_0709059105_3.pdf [file pnas_0709059105_3.pdf]

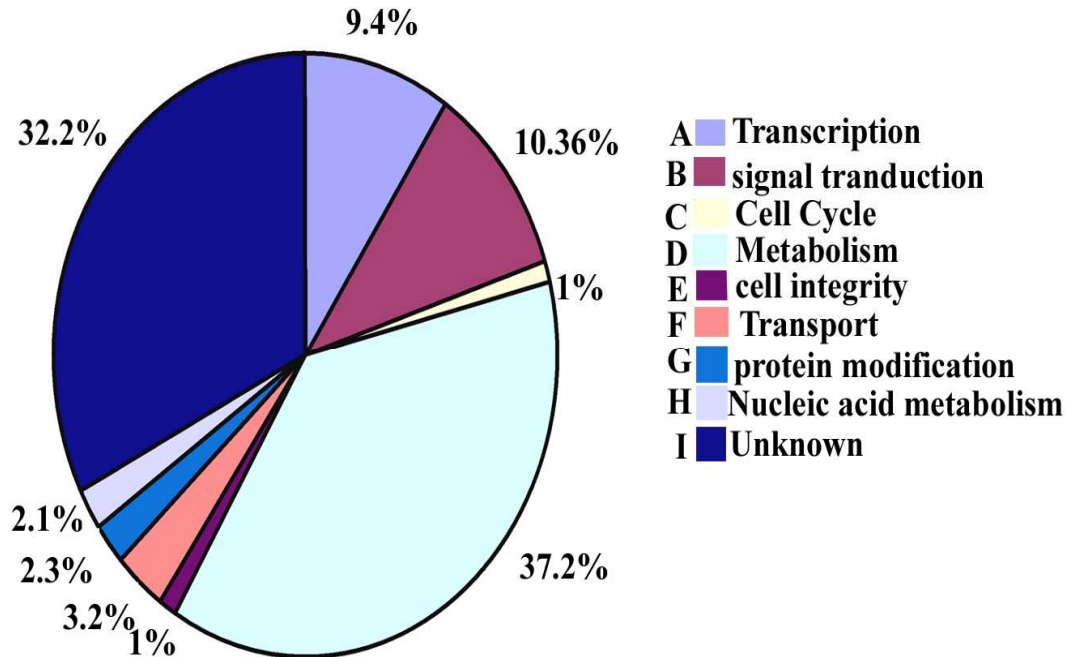

Supplement: pnas_0709059105_4.pdf [file pnas_0709059105_4.pdf]
